# Supplementary material for: The MYB/miR-130a/NDRG2 axis modulates tumor proliferation and metastatic potential in salivary adenoid cystic carcinoma
Source: PubMed Central journal article supplement (PMC6134089; doi:10.1038/s41419-018-0966-2), 2018-09-11

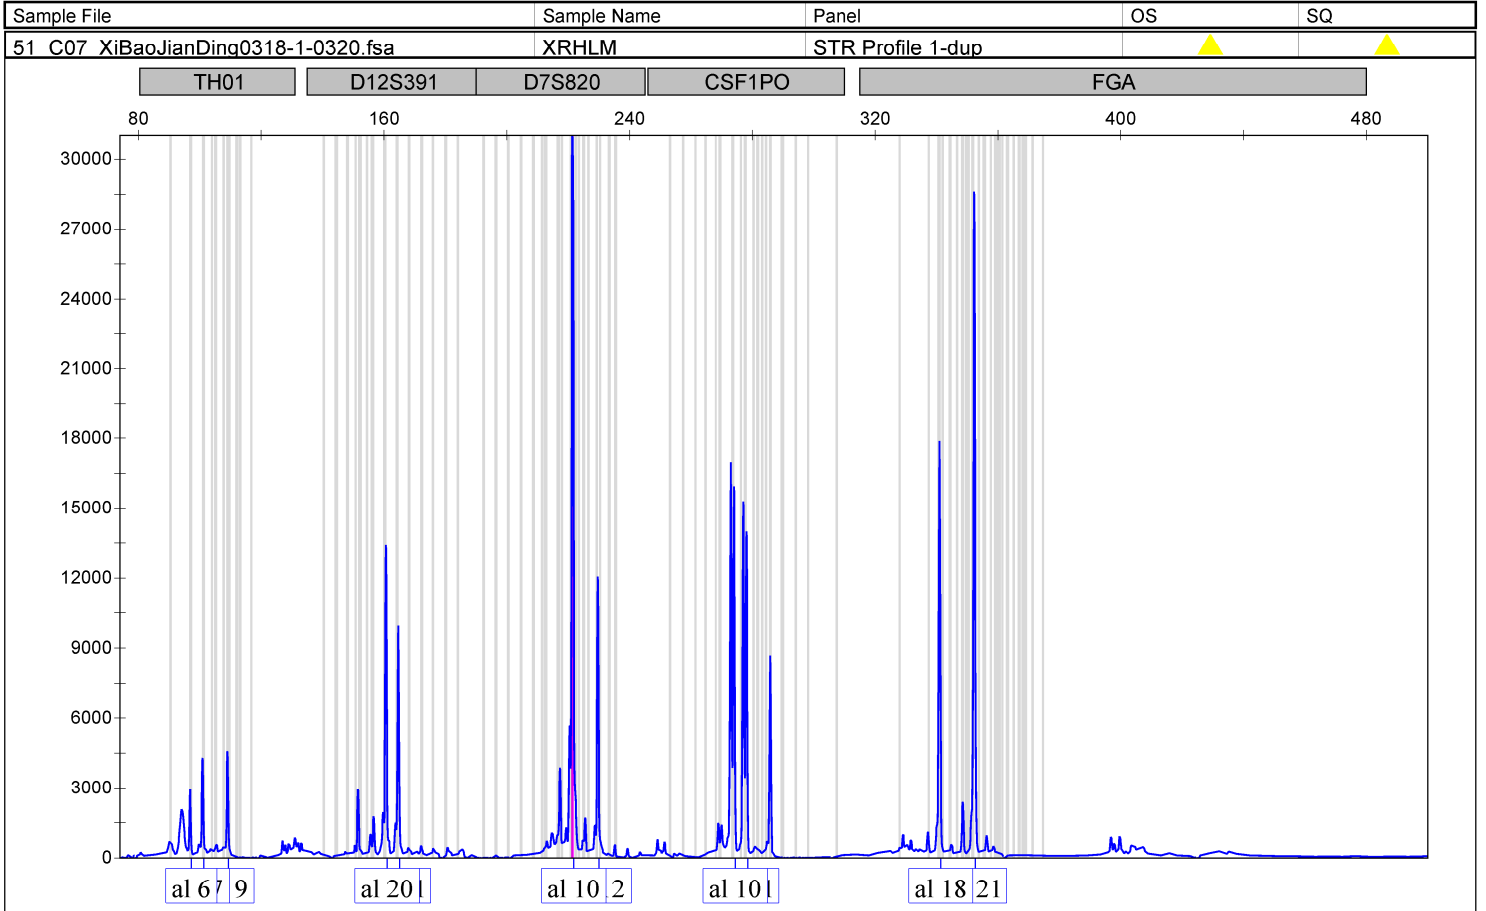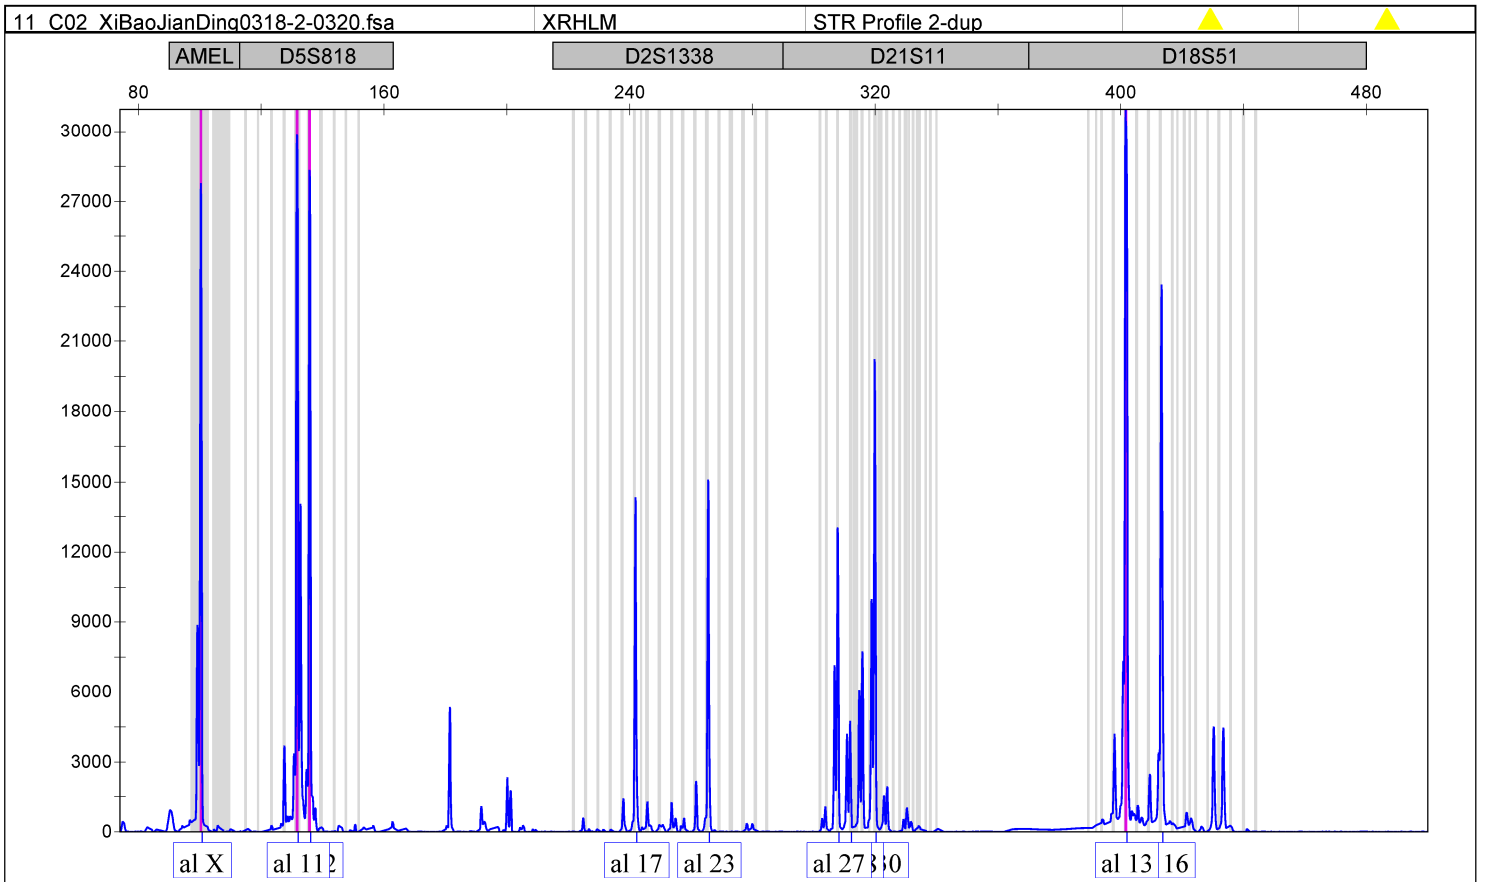

| Sample File                         | Sample Name | Panel             | OS | SQ |
|-------------------------------------|-------------|-------------------|----|----|
| 67 C09 XiBaoJianDing0318-2-0320.fsa | XRHLM       | STR Profile 3-dup | ■  | ▲  |

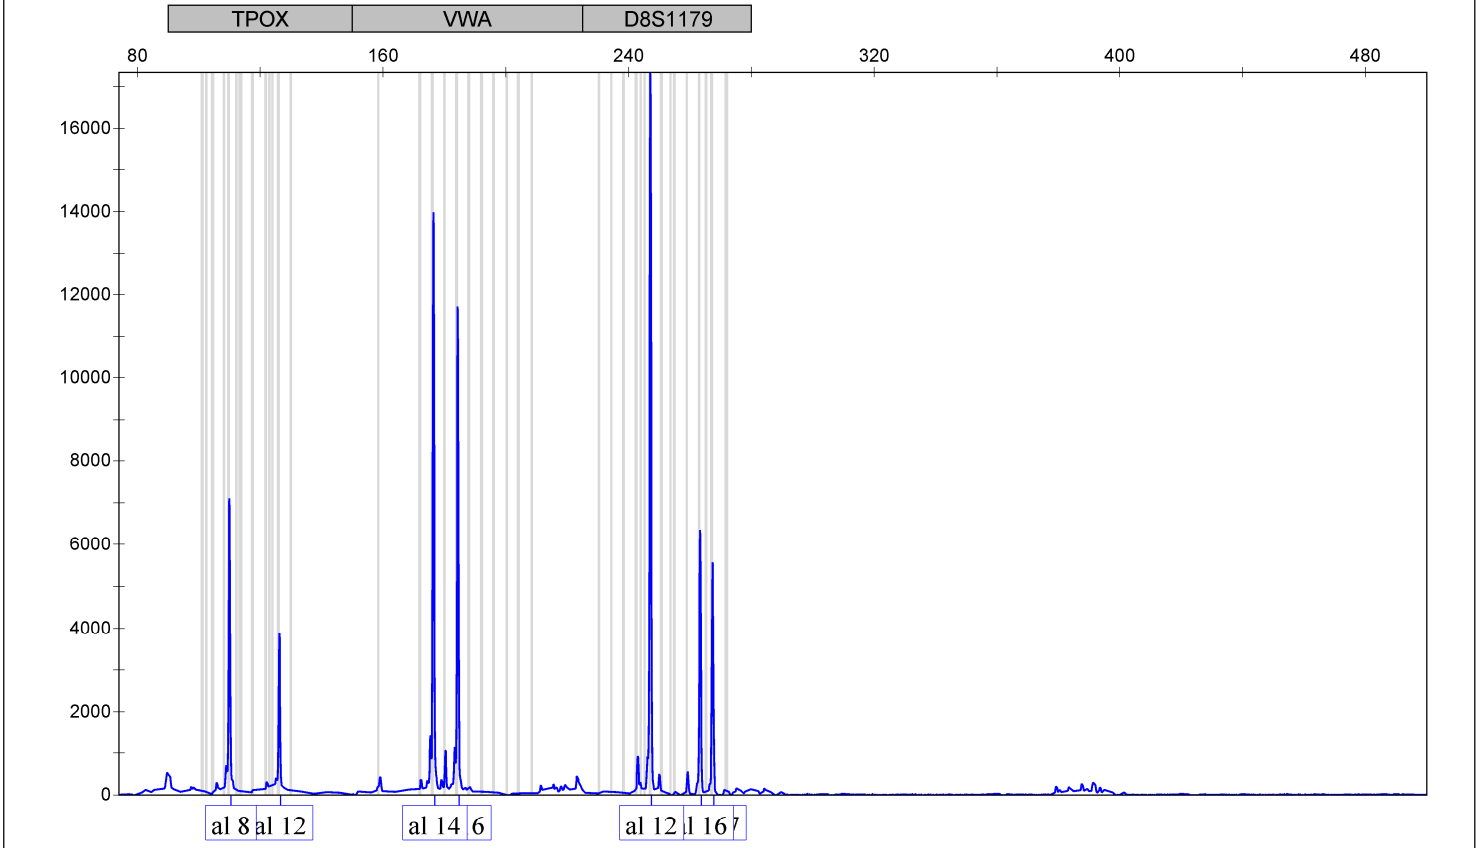

| Sample File                         | Sample Name | Panel             | OS | SQ |
|-------------------------------------|-------------|-------------------|----|----|
| 51 C07 XiBaoJianDing0318-3-0324.fsa | XRHLM       | STR Profile 4-dup | ▲  | ▲  |

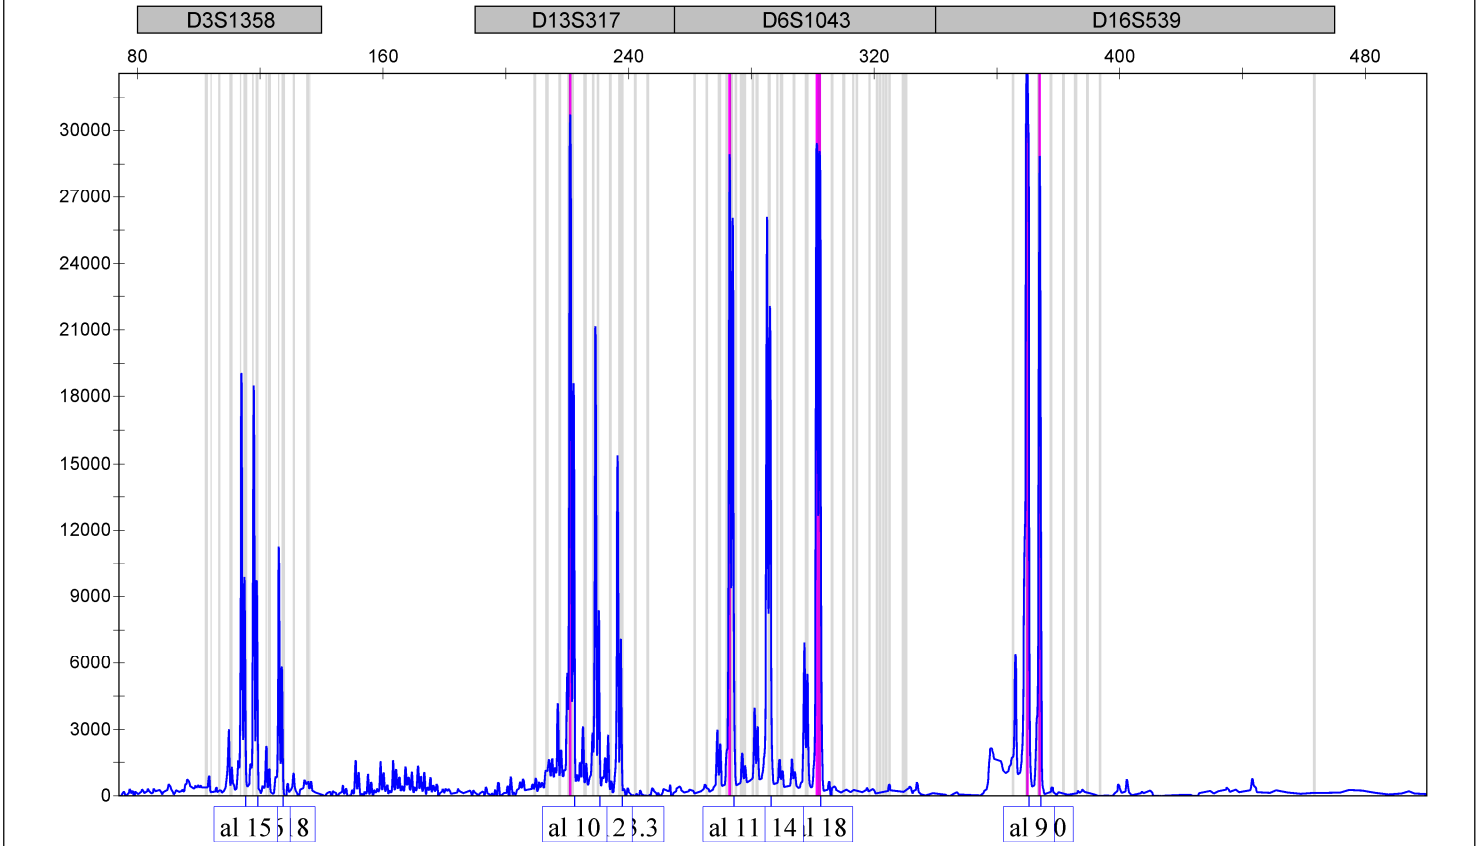

| Sample File                               | Sample Name | Panel             | OS | SQ |
|-------------------------------------------|-------------|-------------------|----|----|
| 51 C07_XBJD1-9XJ-49-10WZCXS11-12-0324.fsa | XRHLM       | STR Profile 5-dup | ▲  | ▲  |

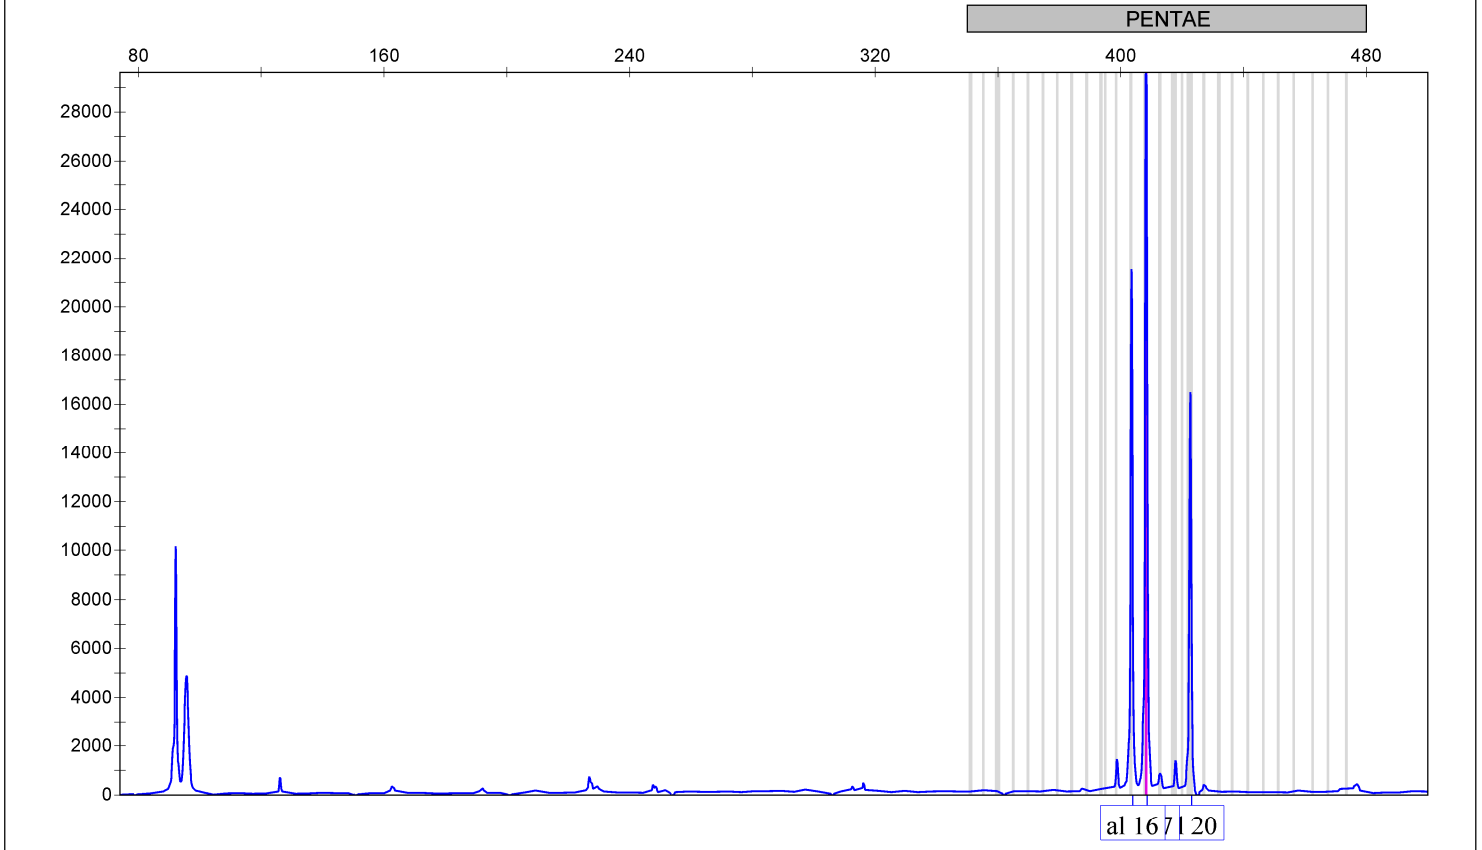

| Sample File                               | Sample Name | Panel             | OS | SQ |
|-------------------------------------------|-------------|-------------------|----|----|
| 67 C09_XBJD1-9XJ-49-10WZCXS11-12-0324.fsa | XRHLM       | STR Profile 6-dup | ■  | ▲  |

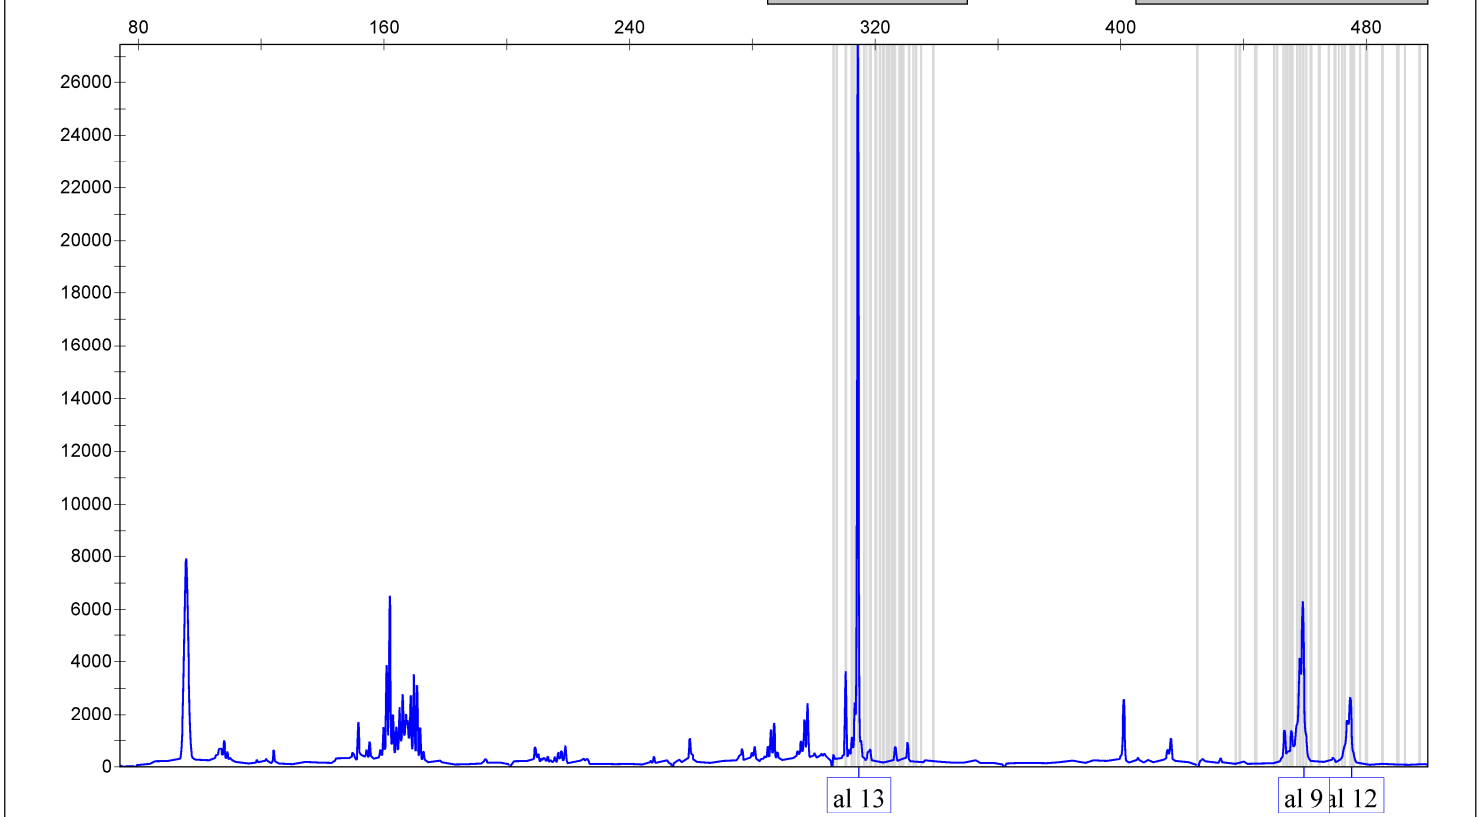

Supplement: 41419_2018_966_MOESM1_ESM.pdf [file 41419_2018_966_MOESM1_ESM.pdf]
