# Supplementary material for: The MYB/miR-130a/NDRG2 axis modulates tumor proliferation and metastatic potential in salivary adenoid cystic carcinoma
Source: PubMed Central journal article supplement (PMC6134089; doi:10.1038/s41419-018-0966-2), 2018-09-11
Supplement: 41419_2018_966_MOESM2_ESM.pdf [file 41419_2018_966_MOESM2_ESM.pdf]

**Supplementary Table 1: Correlation Between NDRG2 Expression and Clinicopathologic Parameters of Adenoid Cystic Carcinoma**

| Characteristics            | NDRG2 expression |     | P value      |
|----------------------------|------------------|-----|--------------|
|                            | high             | low |              |
| <b>Age, y</b>              |                  |     | <b>0.794</b> |
| ≤55                        | 22               | 50  |              |
| >55                        | 18               | 37  |              |
| <b>Sex</b>                 |                  |     | <b>0.21</b>  |
| Male                       | 15               | 44  |              |
| Female                     | 25               | 43  |              |
| <b>Tumor site</b>          |                  |     | <b>0.261</b> |
| Major glands               | 15               | 24  |              |
| Minor glands               | 25               | 63  |              |
| <b>Histological grade</b>  |                  |     | <b>0.713</b> |
| I-II                       | 33               | 74  |              |
| III                        | 7                | 13  |              |
| <b>Perineural invasion</b> |                  |     | <b>0.667</b> |
| Yes                        | 27               | 62  |              |
| No                         | 13               | 25  |              |
| <b>Recurrence</b>          |                  |     | <b>0.783</b> |
| Yes                        | 11               | 26  |              |
| No                         | 29               | 61  |              |
| <b>Distant metastasis</b>  |                  |     | <b>.000</b>  |
| Yes                        | 7                | 63  |              |
| No                         | 33               | 24  |              |

**Supplementary Table 2: primary antibodies used in this study**

| Protein | Assay   | Antibody              |
|---------|---------|-----------------------|
| NDRG2   | WB, IHC | sc-376202, Santa Cruz |
| MYB     | WB      | Ab-45150, Abcam       |
| Stat3   | WB      | 9139, CST             |
| p-Stat3 | WB      | 52075, CST            |
| AKT     | WB      | 4685s, CST            |
| p-AKT   | WB      | 4051, CST             |

**Supplementary Table 3: Sequences of primers, miRNA mimics, inhibitors and siRNAs**

| Name                      | Sequences(5'-3')                                     |
|---------------------------|------------------------------------------------------|
| hsa-miR-130a mimic        | CAGUGCAAUGUUAAAAGGGCAU<br>AUGCCCUUUUAAACAUUGCACUG    |
| hsa-miR-181a inhibitor    | ACUCACCGACAGCGUUGAAUGUU                              |
| hsa-miR-324a-3p inhibitor | CCAGCAGCACCUGGGGCAGUGGG                              |
| hsa-miR-130a inhibitor    | AUGCCCUUUUAAACAUUGCACUG                              |
| mimic-control             | UCACAACCUCCUAGAAAGAGUAGA<br>UCUACUCUUUCUAGGAGGUUGUGA |
| inhibitor-control         | UCUACUCUUUCUAGGAGGUUGUGA                             |
| siMYB-1                   | AAAGUACUAAACCCUGAGC tt<br>GCUCAGGGUUUAGUACUUU tt     |
| siMYB-2                   | CAAUGUUCUCAAAGCAUUU tt<br>AAAUGC UUUGAGAACA UUG tt   |
| siMYB-3                   | CUUGGAAAUGCCUUCUUUA tt<br>UAAAGAAGGCAUUUCCAAG tt     |
| siRNA-control             | UUCUCCGAACGUGUCACG UdTdT<br>ACGUGACACGUUCGGAGAA dTdT |
| Promoter-site-1-F         | CAAGGAAAATGATGTCTTTGGAGC                             |
| Promoter-site-1-R         | GGAGAGAGAACAACACAAAGGCT                              |
| Promoter-site-2-F         | AGAAGCAAGACTGGACAAACAC                               |
| Promoter-site-2-R         | TTGGAGGATAAGGAGGGCAG                                 |
| Promoter-site-3-F         | TGGGCTGTCCATCTTCTTGT                                 |
| Promoter-site-3-R         | GAGCACACACATACATGTACATCAT                            |
| Promoter-site-4-F         | ATTAAAAAGCCACTTCCTCAGTCAC                            |
| Promoter-site-4-R         | CCTGATCTTGCAAGACTGTCATTAA                            |
| Promoter-site-5-F         | CATCTAAACCCAAAGAATGGACC                              |
| Promoter-site-5-R         | TGACCCCATAGTACTCAGCCTAT                              |
| Promoter-site-6-F         | GCATTTTGTTGCAGCCATA                                  |
| Promoter-site-6-R         | TAGCTGGCATCTGCTGGTTG                                 |

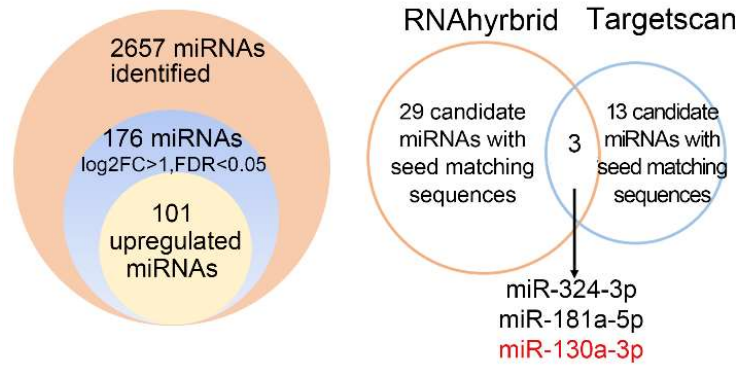

**Supplementary Figure 1: Venn diagrams showing the number of total mapped miRNAs in both groups, the number of differentially expressed miRNAs and the three candidate miRNAs regulating NDRG2 in the two groups.**

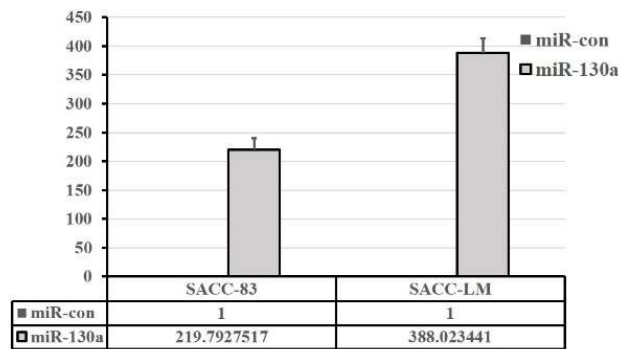

**Supplementary Figure 2: The relative miR-130a levels in miR-130a over-expression cells and the control cells.**

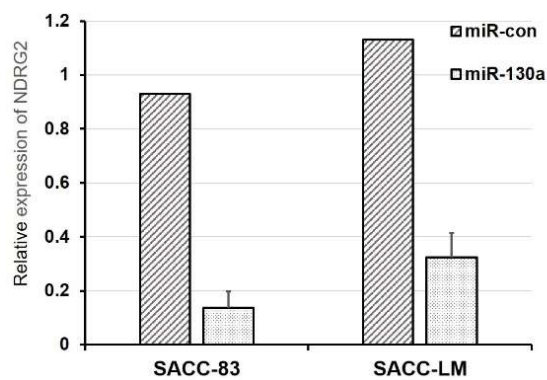

**Supplementary Figure 3: The relative mRNA levels of NDRG2 in miR-130a over-expression cells and the control cells.**

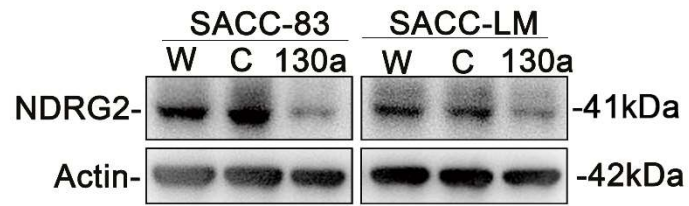

**Supplementary Figure 4: the reduction of NDRG2 protein amounts in miR-130a-overexpressing cell lines.**

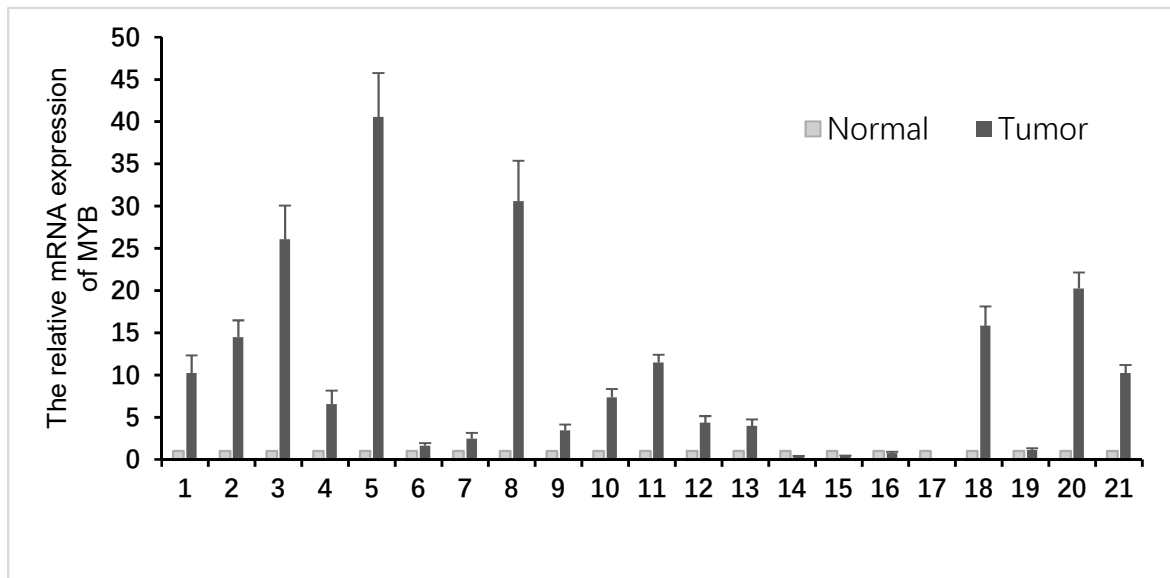

**Supplementary Figure 5: the relative expressions of MYB in tumors and the corresponding normal salivary gland of fresh samples.**
