# Supplementary material for: The MYB/miR-130a/NDRG2 axis modulates tumor proliferation and metastatic potential in salivary adenoid cystic carcinoma
Source: PubMed Central journal article supplement (PMC6134089; doi:10.1038/s41419-018-0966-2), 2018-09-11

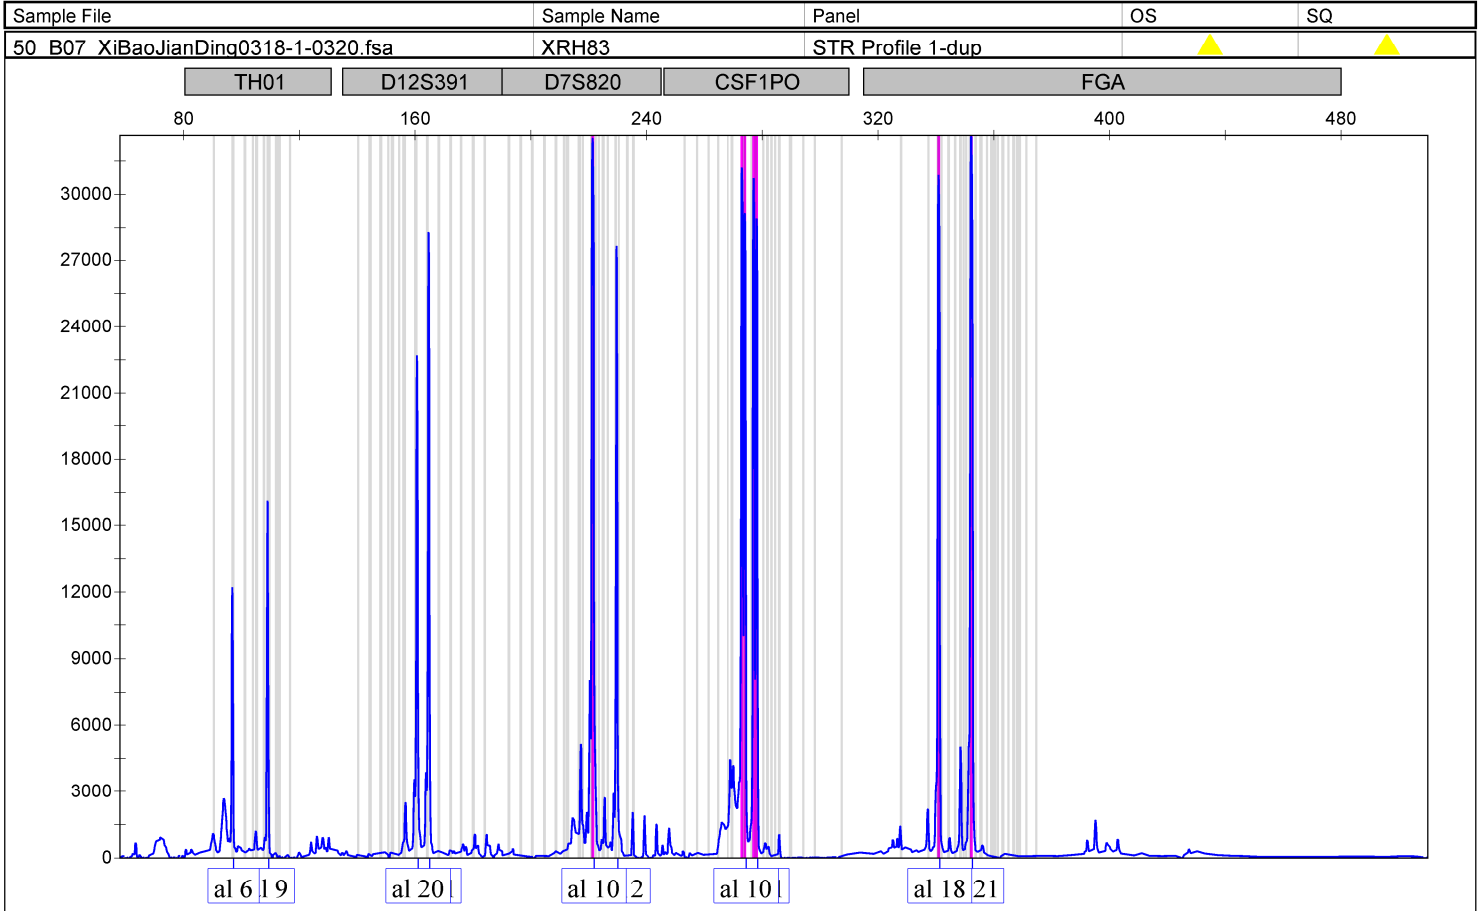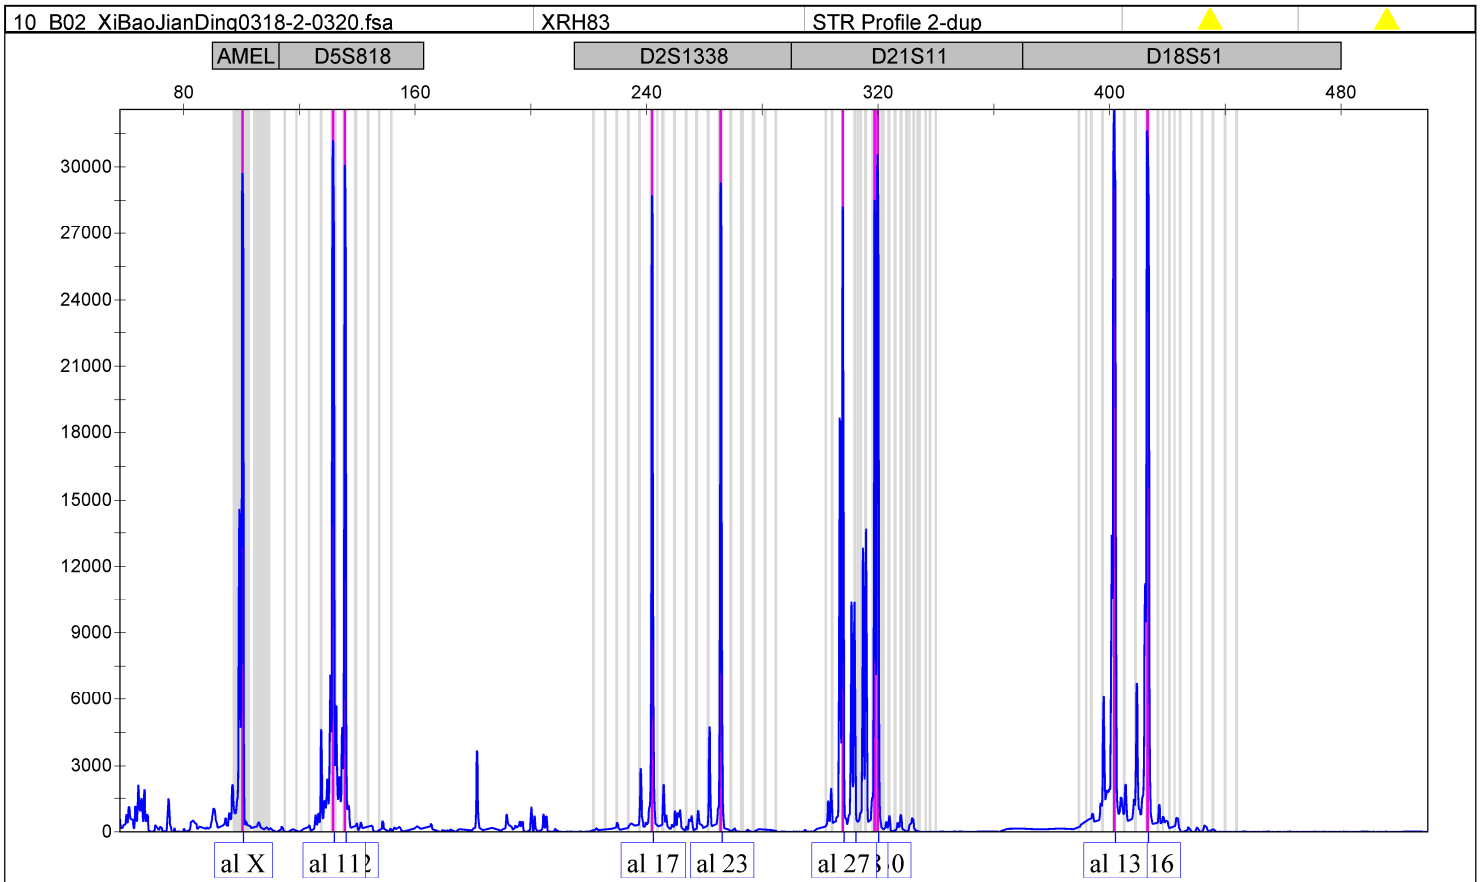

| Sample File                         | Sample Name | Panel             | OS | SQ |
|-------------------------------------|-------------|-------------------|----|----|
| 66 B09 XiBaoJianDing0318-2-0320.fsa | XRH83       | STR Profile 3-dup | ▲  | ▲  |

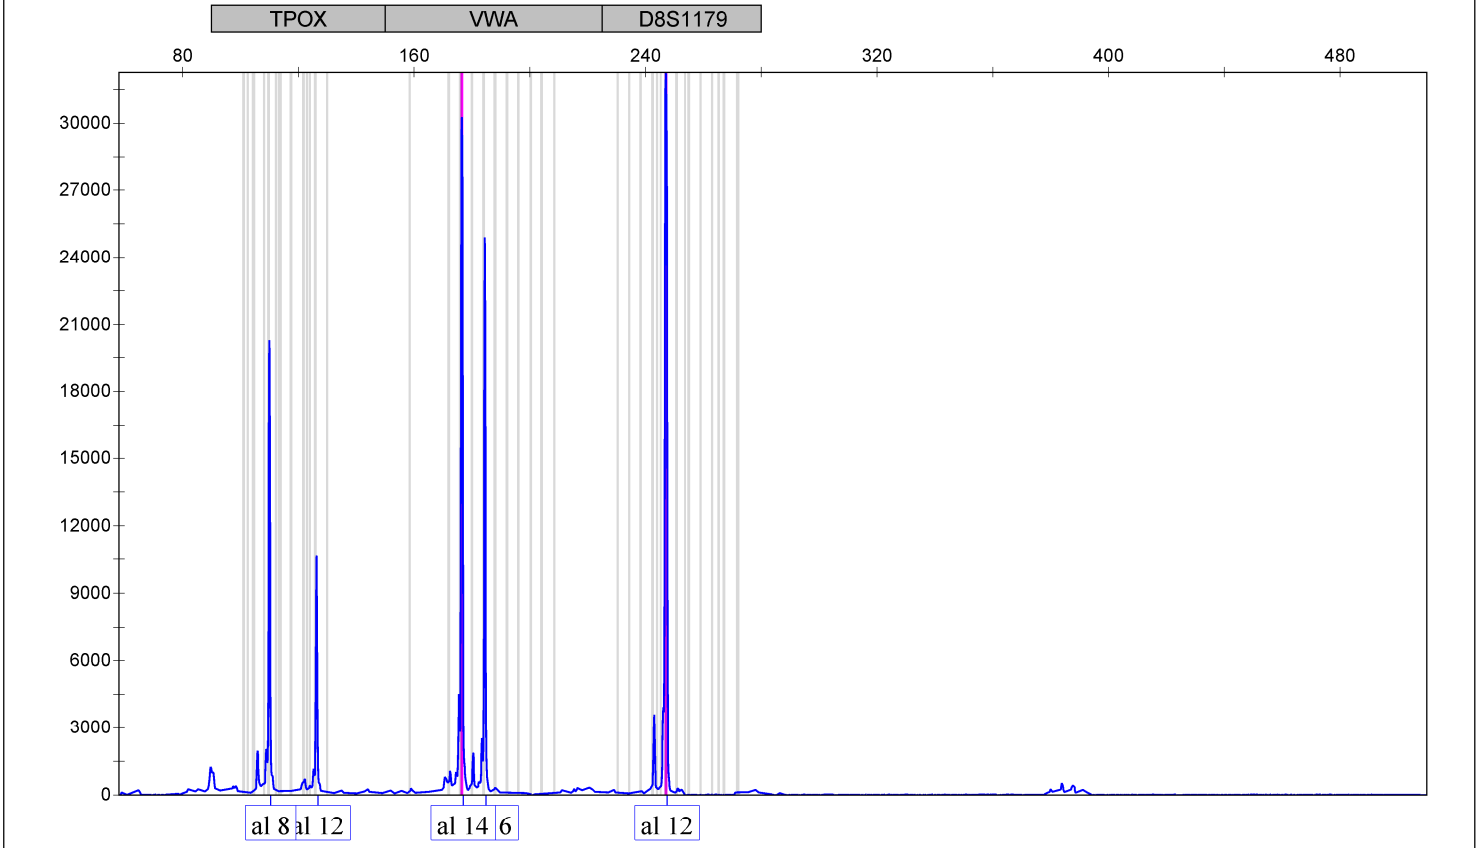

| Sample File                         | Sample Name | Panel             | OS | SQ |
|-------------------------------------|-------------|-------------------|----|----|
| 50 B07 XiBaoJianDing0318-3-0324.fsa | XRH83       | STR Profile 4-dup | ▲  | ▲  |

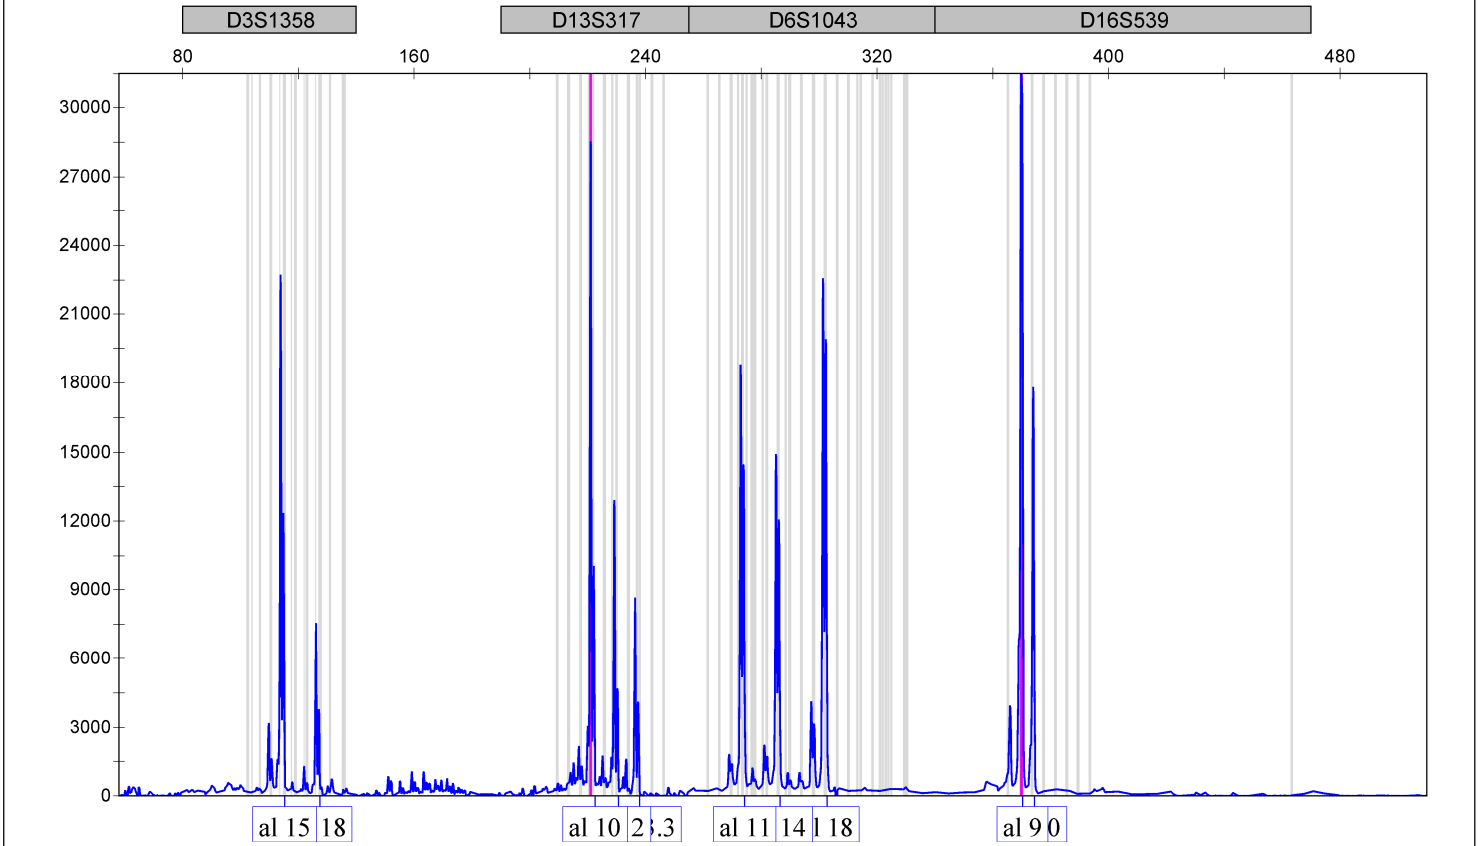

| Sample File                               | Sample Name | Panel             | OS | SQ |
|-------------------------------------------|-------------|-------------------|----|----|
| 50 B07 XBJD1-9XJ-49-10WZCXS11-12-0324.fsa | XRH83       | STR Profile 5-dup | ▲  | ▲  |

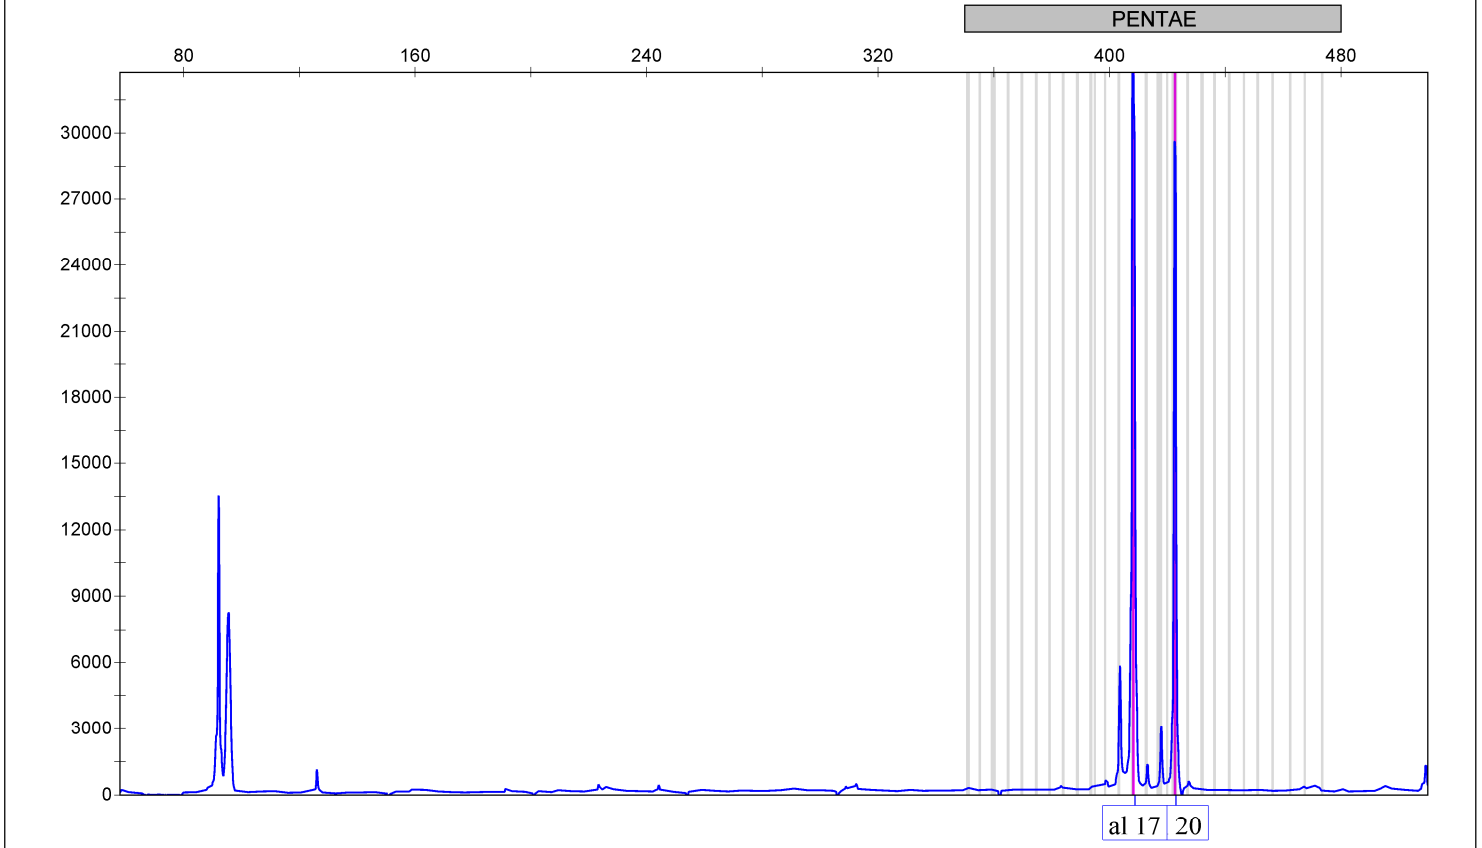

| Sample File                               | Sample Name | Panel             | OS | SQ |
|-------------------------------------------|-------------|-------------------|----|----|
| 66 B09 XBJD1-9XJ-49-10WZCXS11-12-0324.fsa | XRH83       | STR Profile 6-dup | ▲  | ▲  |

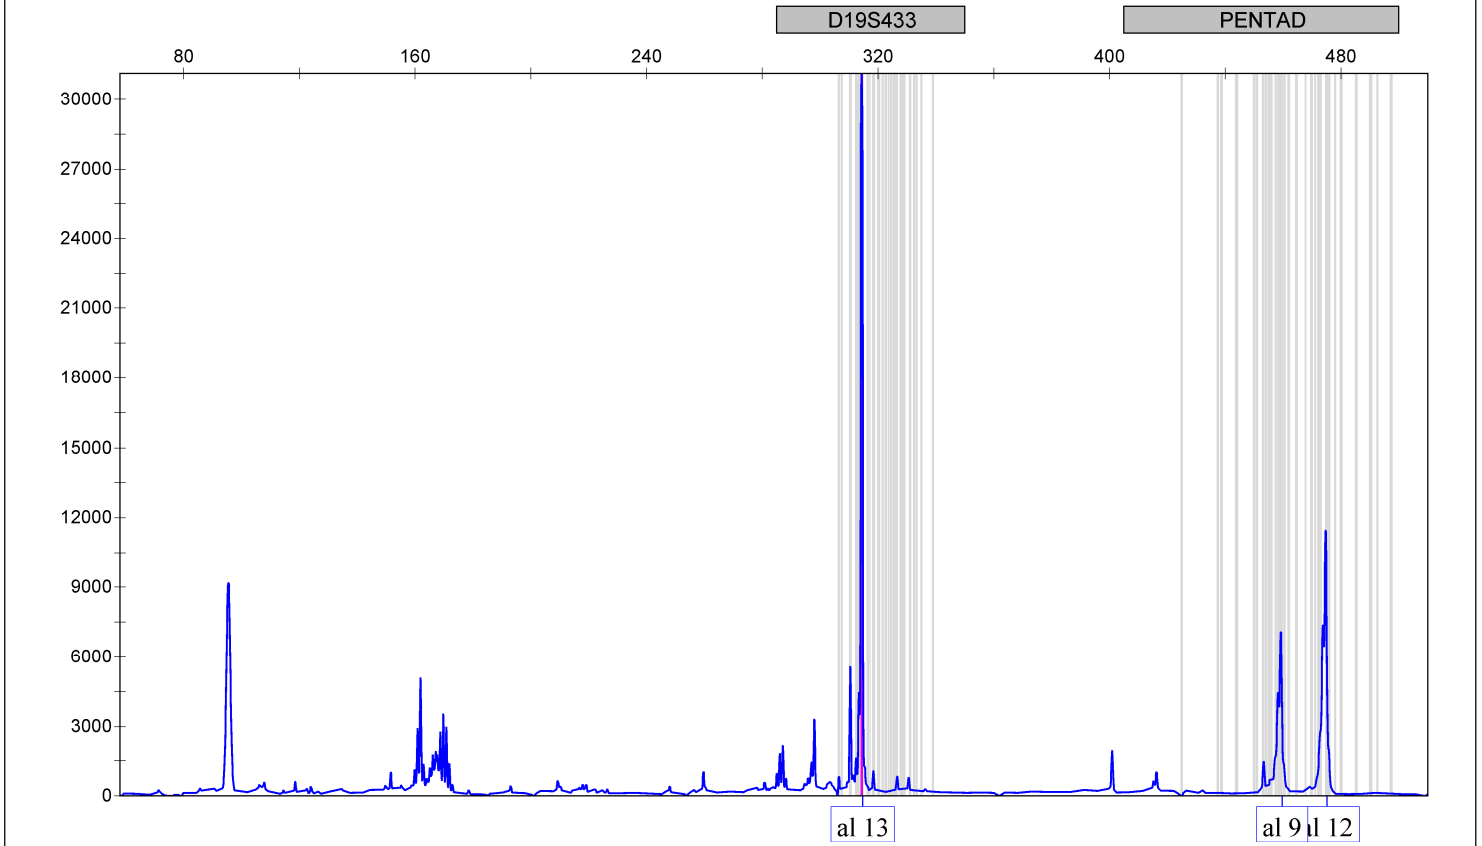

Supplement: 41419_2018_966_MOESM3_ESM.pdf [file 41419_2018_966_MOESM3_ESM.pdf]
